# Supplementary material for: The Sema3A receptor Plexin-A1 suppresses supernumerary axons through Rap1 GTPases
Source: PubMed Central journal article supplement (PMC6199275; doi:10.1038/s41598-018-34092-5), 2018-10-23
Supplement: 41598_2018_34092_MOESM1_ESM.pdf [file 41598_2018_34092_MOESM1_ESM.pdf]

# **The Sema3A receptor Plexin-A1 suppresses supernumerary axons through Rap1 GTPases**

## **Supplementary material**

Nannan Wang<sup>1</sup>, Pratibha Dhumale<sup>1,2,3,\*</sup>, Joanna Chiang<sup>1,\*</sup>, Andreas W. Püschel<sup>1,2</sup>

<sup>1</sup>Institut für Molekulare Zellbiologie, Westfälische Wilhelms-Universität, Schloßplatz 5, D-48149 Münster, Germany

<sup>2</sup>Cells-in-Motion Cluster of Excellence, University of Münster, D-48149 Münster, Germany

<sup>3</sup>Current address: Department of Cardiovascular and Renal Research, University of Southern Denmark, JB Winsløvs Vej 21, 5000 Odense, Denmark

\* These authors contributed equally to this work

## Supplementary Figures

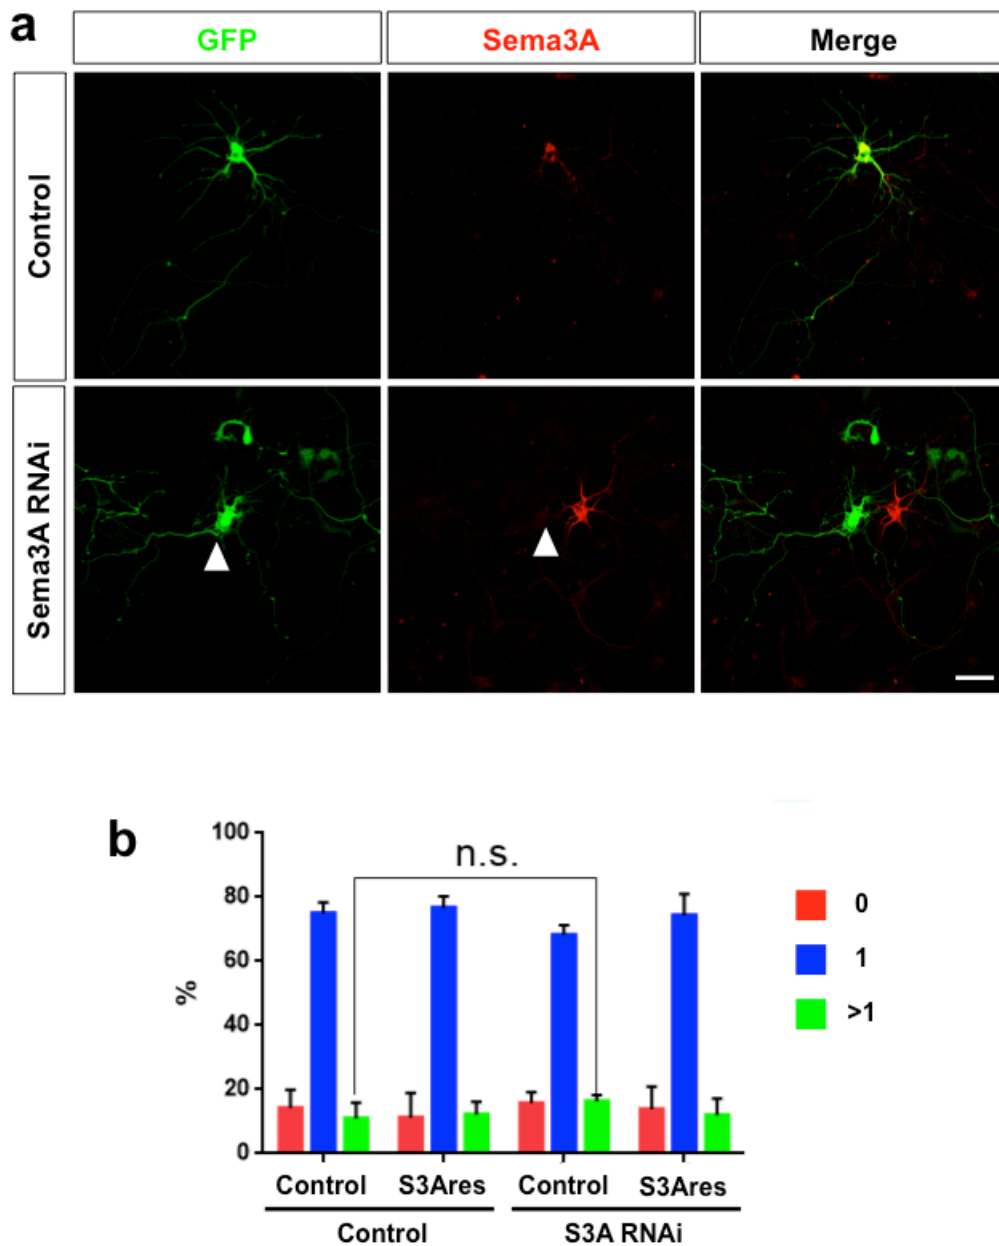

**Figure S1. Knockdown of Sema3A induces the formation of supernumerary axons.** (a) Hippocampal neurons from E18 rat embryos were transfected with vectors for GFP (green) and an shRNA against Sema3A (Sema3A RNAi) or pcDNA6.2-GW/EmGFP-miR (control) and stained at 3 d.i.v. with an anti-Sema3A antibody (red). The arrowhead marks a transfected neuron that is negative for Sema3A while the neighboring non-transfected neuron is positive for Sema3A. (b) Hippocampal neurons from E18 rat embryos were transfected with vectors for GFP and an shRNA against Sema3A (S3A RNAi) or pcDNA6.2-GW/EmGFP-miR (control) and a vector for RNAi-resistant FLAG-Sema3A-res (S3A-res) or pBK-CMV (control) as indicated (see Fig. 2). Non-transfected neurons from the same cultures as shown in Fig. 2 were analyzed at 3 d.i.v.. The percentage of non-transfected, unpolarized neurons without an axon (0, red), polarized neurons with a single axon (1, blue) and neurons with multiple axons (>1, green) is shown (Student's t-test and two-way ANOVA; n=3, independent experiments with >150 neurons per experiment for; values are means  $\pm$  s.e.m.; n.s., not significant).

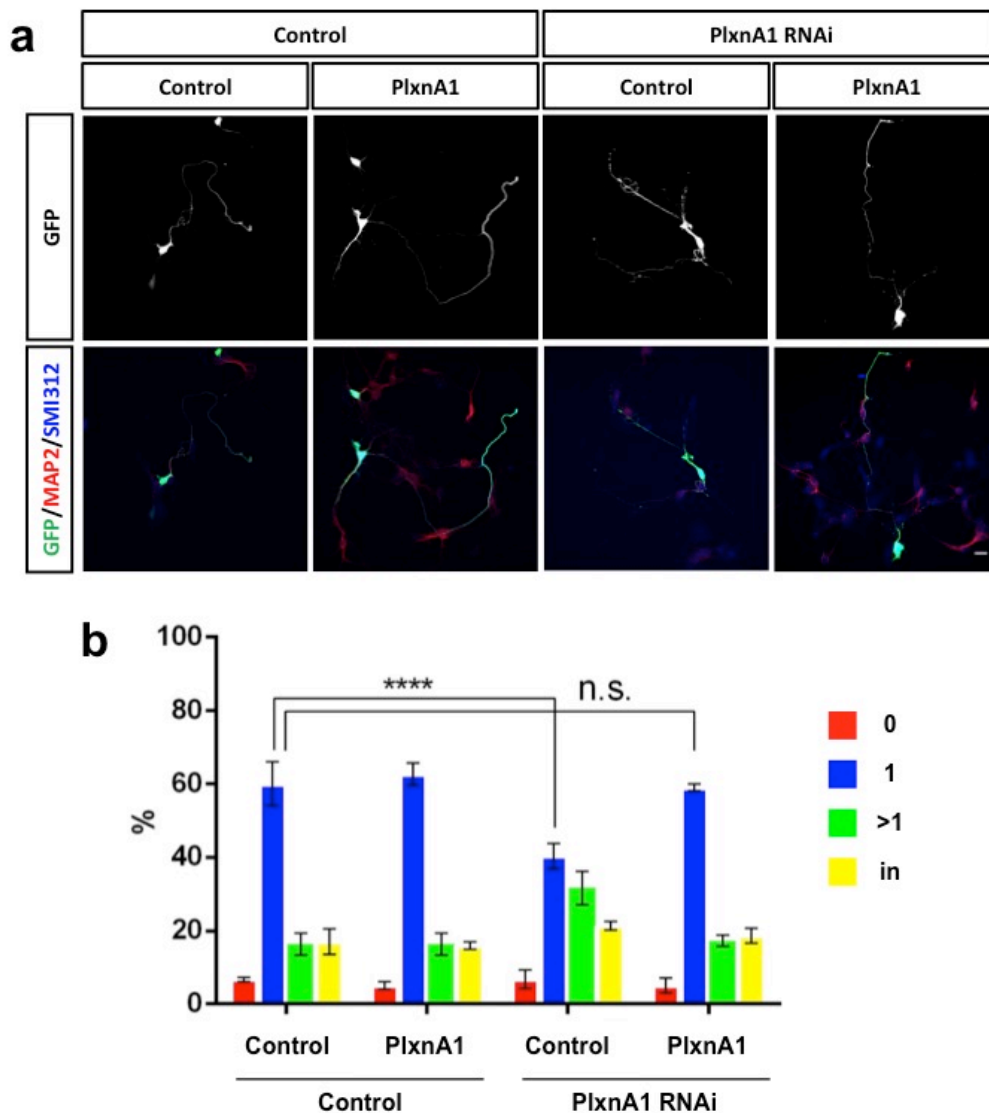

**Figure S2. Specificity of the Plexin-A1 knockdown.** (a) Hippocampal neurons from E18 rat embryos were transfected with vectors for GFP (green), an shRNA against rat Plexin-A1 (PlxnA1 RNAi) or pSUPER (control), and a vector for murine Plexin-A1 (PlxnA1) or pBK-CMV (control) as indicated. The shRNA target site in murine Plexin-A1 contains multiple mismatches in comparison to the rat sequence. Neurons were analyzed at 3 d.i.v. by staining with an anti-MAP2 (red, dendrites) and the SMI-312 antibody (blue, axon). Representative images of transfected neurons are shown. The scale bar is 50  $\mu$ m. (b) The percentage of unpolarized neurons without an axon (0, red), polarized neurons with a single axon (1, blue), neurons with multiple axons (>1, green) and neurons with multiple neurites that are positive for both axonal and dendritic markers (in, yellow) is shown (Tukey's multiple comparisons test and two-way ANOVA; n=3, independent experiments with 100 neurons per experiment; values are means  $\pm$  s.e.m; p > 0.05, not significant (n.s.), \*\*\*\* p < 0.0001 compared to control as indicated).

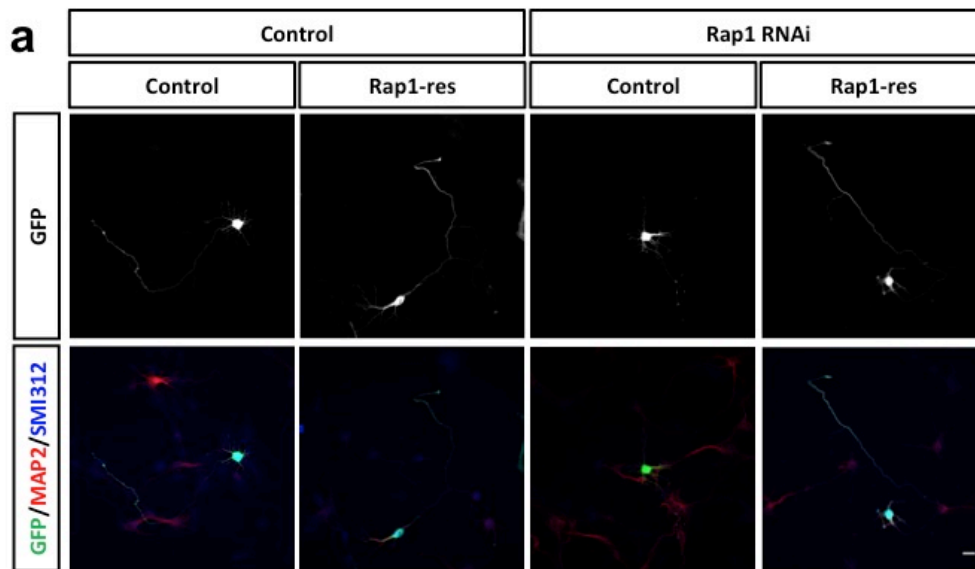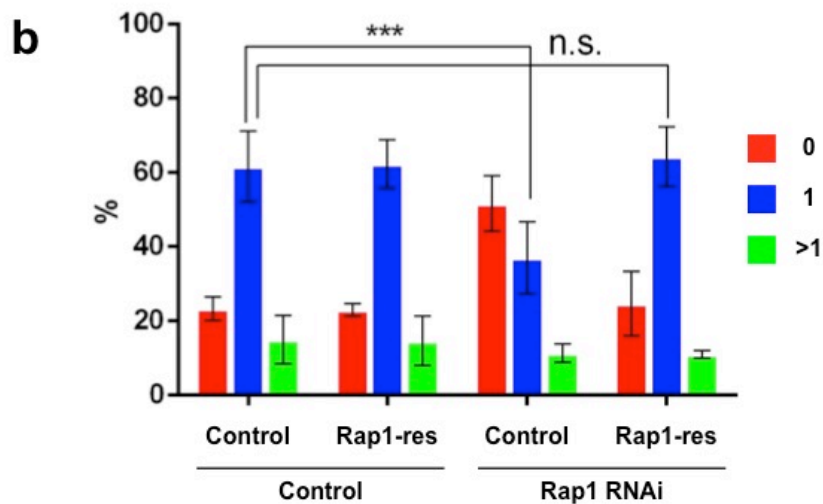

**Figure S3. Specificity of the Rap1B knockdown.** (a) Hippocampal neurons from E18 rat embryos were transfected with vectors for GFP (green), an shRNA against Rap1B (Rap1 RNAi) or pSHAG-1 (control), and a vector for RNAi-resistant Rap1B (Rap1B-res) or pBK-CMV (control) as indicated. Neurons were analyzed at 3 d.i.v. by staining with an anti-MAP2 (red, dendrites) and the SMI-312 antibody (blue, axon). Representative images of transfected neurons are shown. The scale bar is 50  $\mu$ m. (b) The percentage of unpolarized neurons without an axon (0, red), polarized neurons with a single axon (1, blue) and neurons with multiple axons (>1, green) is shown (Tukey's multiple comparisons test and two-way ANOVA; n=3, independent experiments with 100 neurons per experiment; values are means  $\pm$  s.e.m; p> 0.05, not significant (n.s.), \*\*\* p<0.001 compared to control as indicated).

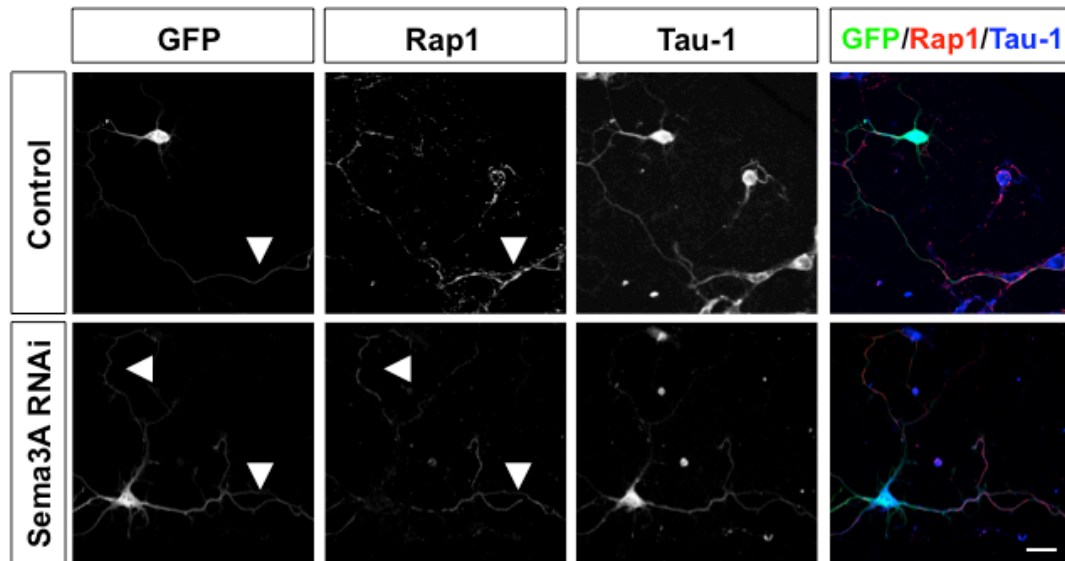

**Figure S4. Supernumerary axons formed after knockdown of Sema3A are positive for Rap1.** Hippocampal neurons from E18 rat embryos were transfected with vectors for GFP (green) and an shRNA against Sema3A (Sema3A RNAi) or pcDNA6.2-GW/EmGFP-miR (control) and stained at 3 d.i.v. with an anti-Rap1 (red) and the Tau-1 antibody (blue). The arrowhead marks Rap1-positive axons.

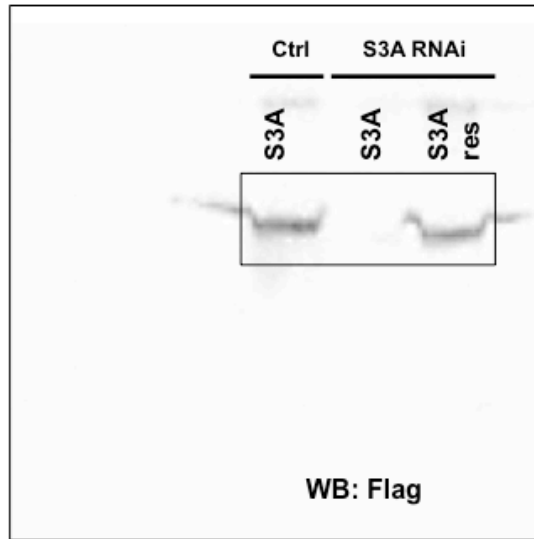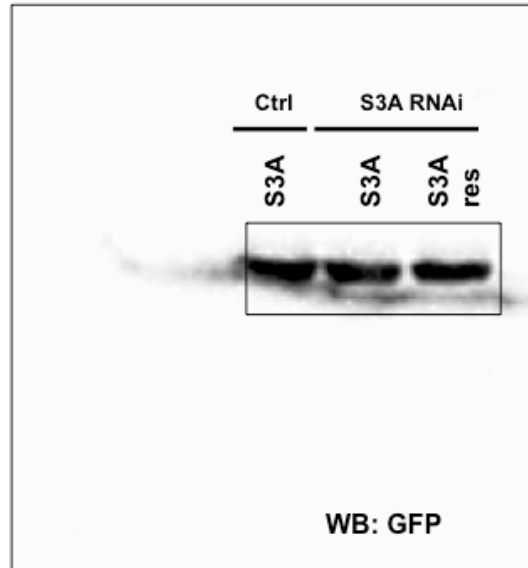

**Figure S5. Full-length blots for Figure 2a.**
